# Supplementary material for: Structural Distortion of Cycloalkynes Influences Cycloaddition Rates both by Strain and Interaction Energies
Source: PubMed Central journal article supplement (PMC6519225; doi:10.1002/chem.201900295), 2019-03-27
Supplement: CHEM-25-6342-s001.pdf [file CHEM-25-6342-s001.pdf]

# CHEMISTRY

## A **European** Journal

### Supporting Information

#### **Structural Distortion of Cycloalkynes Influences Cycloaddition Rates both by Strain and Interaction Energies**

Trevor A. Hamlin<sup>+, [a]</sup> Brian J. Levandowski<sup>+, [b]</sup> Ayush K. Narsaria,<sup>[a]</sup> Kendall N. Houk,<sup>\*, [b]</sup> and F. Matthias Bickelhaupt<sup>\*, [a, c]</sup>

chem\_201900295\_sm\_miscellaneous\_information.pdf

## Contents

**Figure S1.** Strain analysis of **Az** upon reacting with alkynes (black, **2yne**; blue, **7yne**; green, **8yne**; red, **9yne**) computed at M06-2X/TZ2P//M06-2X/6-31+G(d).

**Table S1.** Cartesian coordinates, electronic energies, enthalpies, Gibbs free energies, the number and wavelength of the imaginary vibrational frequencies for all stationary points, computed at M06-2X/6-31+G(d) in the gas phase using Gaussian 09.

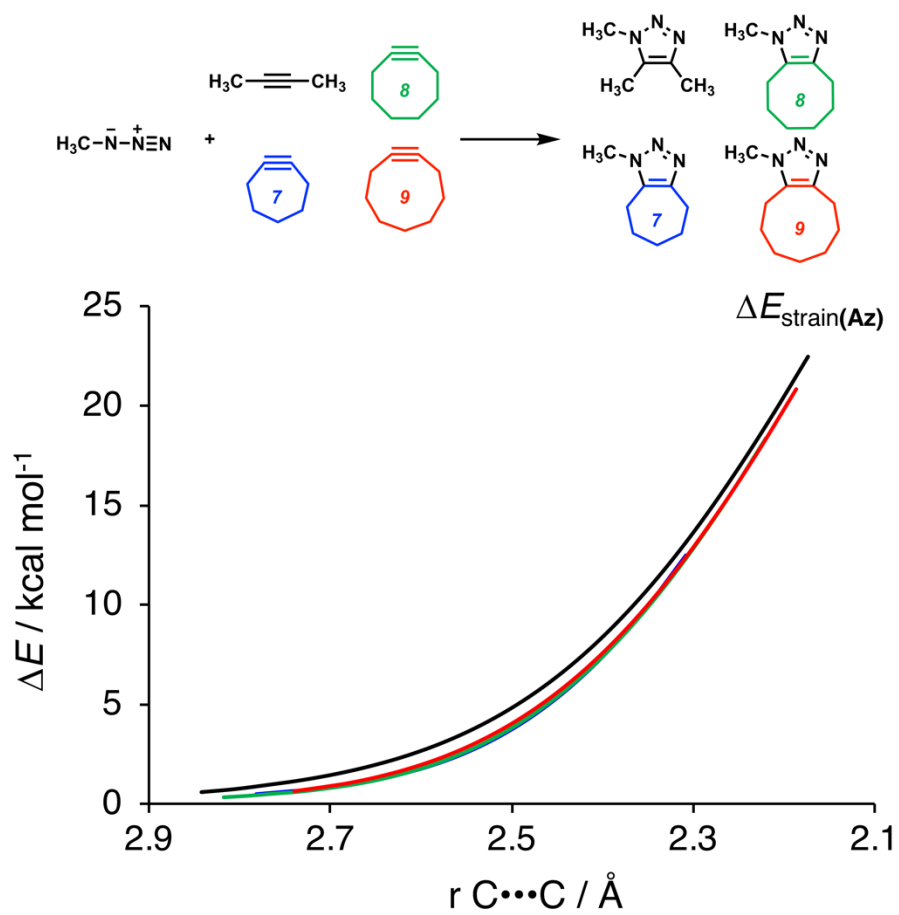

**Figure S1.** Strain analysis of Az upon reacting with alkynes (black, **2yne**; blue, **7yne**; green, **8yne**; red, **9yne**) computed at M06-2X/TZ2P//M06-2X/6-31+G(d).

**Table S1.** Cartesian coordinates (Å), electronic energies (Hartree), enthalpies (Hartree), Gibbs free energies (Hartree), the number and wavelength of the imaginary vibrational frequencies for all stationary points, computed at M06-2X/6-31+G(d) in the gas phase using Gaussian 09.

**Az** - azidomethane

*E* = -203.954015  
*H* = -203.948684  
*G* = -203.980446  
*N*<sub>imag</sub> = 0  

|   |             |            |             |
|---|-------------|------------|-------------|
| N | 1.22685187  | 1.32716047 | 0.00000000  |
| N | 2.28652587  | 1.72437647 | -0.00001000 |
| N | 0.11921287  | 0.78815347 | -0.00001100 |
| C | -1.00622913 | 1.73589747 | -0.00000700 |
| H | -0.99715913 | 2.36908947 | -0.89421300 |
| H | -1.91402013 | 1.13516047 | 0.00000100  |
| H | -0.99715113 | 2.36909447 | 0.89419300  |

**2yne** - 2-butyne

*E* = -155.814722  
*H* = -155.808947  
*G* = -155.839613  
*N*<sub>imag</sub> = 0  

|   |             |            |             |
|---|-------------|------------|-------------|
| C | -1.52006176 | 1.62037035 | 0.00000000  |
| C | -1.52006176 | 1.62037035 | -1.20814200 |
| C | -1.52006176 | 1.62037035 | -2.67335200 |
| C | -1.52006176 | 1.62037035 | 1.46521000  |
| H | -0.63478776 | 1.10925735 | -3.06342500 |
| H | -1.52006176 | 2.64259635 | 1.85528300  |
| H | -0.63478776 | 1.10925735 | 1.85528300  |
| H | -2.40533576 | 1.10925735 | 1.85528300  |
| H | -2.40533576 | 1.10925735 | -3.06342500 |
| H | -1.52006176 | 2.64259635 | -3.06342500 |

**7yne** - cycloheptyne

*E* = -272.546783  
*H* = -272.386511  
*G* = -272.423894  
*N*<sub>imag</sub> = 0  

|   |             |            |             |
|---|-------------|------------|-------------|
| C | -0.64043211 | 0.83333332 | 0.00000000  |
| C | 0.58671489  | 1.64709832 | 0.05434400  |
| C | 0.09773789  | 3.08694632 | -0.25802500 |
| C | -1.23649311 | 3.52311232 | 0.41121500  |
| C | -2.57072711 | 3.08694432 | -0.25802200 |
| C | -3.05969711 | 1.64709332 | 0.05434400  |
| C | -1.83254711 | 0.83333332 | -0.00001000 |
| H | 1.02598689  | 1.59344832 | 1.04554400  |
| H | 1.34674089  | 1.33721732 | -0.65345400 |
| H | 0.87589789  | 3.78534232 | 0.04189800  |
| H | -0.00669911 | 3.18597532 | -1.33530900 |
| H | -1.23649211 | 3.22728432 | 1.45872900  |
| H | -1.23649511 | 4.60991232 | 0.40947700  |
| H | -3.34888811 | 3.78533632 | 0.04190800  |
| H | -2.46629411 | 3.18597832 | -1.33530600 |
| H | -3.49896311 | 1.59343632 | 1.04554600  |
| H | -3.81972611 | 1.33721232 | -0.65345200 |

**8yne** - cyclooctyne

*E* = -311.856191  
*H* = -311.665467  
*G* = -311.705879  
*N*<sub>imag</sub> = 0  

|   |             |            |             |
|---|-------------|------------|-------------|
| C | -1.47376546 | 2.43827157 | 0.00000000  |
| C | -0.28600146 | 2.43826957 | -0.07191300 |
| C | 1.07045654  | 2.99084457 | -0.16797700 |
| C | 0.97214054  | 4.47563657 | 0.25126000  |
| C | -0.18518246 | 5.27841057 | -0.39130100 |
| C | -1.57459146 | 5.27840957 | 0.31938700  |
| C | -2.73191346 | 4.47563357 | -0.32317400 |
| C | -2.83022446 | 2.99084057 | 0.09606200  |
| H | 1.77912354  | 2.46532057 | 0.46292300  |
| H | 1.42911754  | 2.90905157 | -1.18976700 |
| H | 0.88449554  | 4.52609057 | 1.33319200  |
| H | 1.91359654  | 4.95693557 | -0.00316700 |
| H | -0.30195346 | 4.97402057 | -1.42878400 |
| H | 0.14711054  | 6.31211557 | -0.42752400 |
| H | -1.45782146 | 4.97402057 | 1.35687000  |
| H | -1.90688646 | 6.31211457 | 0.35560800  |
| H | -2.64426946 | 4.52608957 | -1.40510500 |
| H | -3.67337046 | 4.95693057 | -0.06874500 |
| H | -3.18888746 | 2.90904657 | 1.11785200  |
| H | -3.53888846 | 2.46531457 | -0.53484000 |

**9yne** - cyclononyne

*E* = -351.157172  
*H* = -350.935678  
*G* = -350.978972  
*N*<sub>imag</sub> = 0  

|   |             |            |             |
|---|-------------|------------|-------------|
| C | -1.18055558 | 1.52777776 | 0.00000000  |
| C | 0.00941342  | 1.52774276 | 0.00000300  |
| C | 0.74035142  | 4.31066176 | 0.37143900  |
| C | -0.58560958 | 4.54694676 | -0.40444600 |
| C | -1.91155658 | 4.31063776 | 0.37145500  |
| C | -2.88153858 | 3.31100576 | -0.29161200 |
| C | -2.61913558 | 1.82978476 | 0.05763500  |
| H | 0.53100842  | 3.98052576 | 1.38535600  |
| H | 1.25963242  | 5.25939276 | 0.47265900  |
| H | -0.58562258 | 5.57067876 | -0.76927600 |
| H | -0.58560858 | 3.92836376 | -1.29295400 |
| H | -1.70219458 | 3.98048276 | 1.38536200  |
| H | -2.43084658 | 5.25936176 | 0.47270300  |
| H | -3.90115858 | 3.53940876 | 0.00800600  |
| H | -2.84476458 | 3.43712576 | -1.37026000 |
| H | -2.97416358 | 1.62565476 | 1.06386700  |
| H | -3.18093058 | 1.18391976 | -0.60929400 |
| C | 1.71033842  | 3.31103176 | -0.29162400 |
| C | 1.44797942  | 1.82981076 | 0.05765400  |
| H | 2.00980742  | 1.18394976 | -0.60925200 |
| H | 1.80300042  | 1.62571576 | 1.06389600  |
| H | 1.67354642  | 3.43713176 | -1.37027400 |
| H | 2.72995742  | 3.53946376 | 0.00797500  |

**Az-2yne-TS** $E = -359.733432$  $H = -359.722670$  $G = -359.768193$  $N_{\text{imag}} = 0, \nu = -493.8811i \text{ cm}^{-1}$ 

|   |             |             |             |
|---|-------------|-------------|-------------|
| C | -0.62500001 | -0.46296296 | 0.00000000  |
| C | -1.60233201 | 0.29252904  | -0.08039000 |
| C | 0.78508399  | -0.87816996 | 0.13629900  |
| H | 1.09876499  | -1.46811996 | -0.72979800 |
| H | 0.91469799  | -1.50695696 | 1.02214300  |
| C | -2.38567501 | 1.54057504  | -0.13907000 |
| H | -3.08629501 | 1.60851004  | 0.70003800  |
| H | -2.96364601 | 1.59394104  | -1.06652800 |
| N | -2.58106801 | -2.12769496 | -0.21999900 |
| N | -1.47097301 | -2.44166996 | -0.12358100 |
| N | -3.27145001 | -1.09241596 | -0.39347800 |
| C | -4.55118501 | -1.00961096 | 0.30344700  |
| H | -4.44164801 | -1.14648596 | 1.38612000  |
| H | -4.94428001 | -0.01098796 | 0.10633800  |
| H | -5.26606301 | -1.74022396 | -0.08769500 |
| H | -1.72115801 | 2.40919704  | -0.09466800 |
| H | 1.44267499  | -0.00802196 | 0.22382400  |

**Az-7yne-TS** $E = -476.337540$  $H = -476.325171$  $G = -476.375339$  $N_{\text{imag}} = 0, \nu = -381.5793i \text{ cm}^{-1}$ 

|   |             |             |             |
|---|-------------|-------------|-------------|
| C | -0.67129631 | 1.41963140  | 0.01858399  |
| C | -0.36686331 | 0.23130440  | -0.09207601 |
| C | -1.83386031 | 2.32009940  | 0.13278399  |
| H | -1.99965231 | 2.81705740  | -0.83195001 |
| H | -1.68415731 | 3.11315040  | 0.87317599  |
| C | -0.89196031 | -1.13637660 | -0.23992301 |
| H | -0.33668531 | -1.88190760 | 0.34141699  |
| H | -0.82698131 | -1.43913460 | -1.29318301 |
| N | 1.95176769  | 1.45348940  | -0.15621101 |
| N | 1.43683369  | 2.47180340  | -0.06185001 |
| C | -3.18122931 | 0.12600340  | -0.29913501 |
| C | -3.05314731 | 1.44618540  | 0.49996599  |
| H | -3.00004731 | 1.20229640  | 1.56935799  |
| H | -3.96527631 | 2.04022840  | 0.35881499  |
| H | -4.23807731 | -0.16448960 | -0.27655001 |
| H | -2.93769631 | 0.31008140  | -1.35583901 |
| C | -2.36787331 | -1.08604060 | 0.21709199  |
| H | -2.39348431 | -1.07984960 | 1.31475099  |
| H | -2.86100531 | -2.01245360 | -0.10338001 |
| N | 1.87570869  | 0.22425640  | -0.36024101 |
| C | 2.62799669  | -0.62661360 | 0.56510999  |
| H | 3.70661869  | -0.52555160 | 0.41001999  |
| H | 2.38232069  | -0.40532260 | 1.61020699  |
| H | 2.34108369  | -1.65304160 | 0.33572899  |

**Az-8yne-TS** $E = -515.609342$  $H = -515.595799$  $G = -515.648746$  $N_{\text{imag}} = 0, \nu = -437.4048i \text{ cm}^{-1}$ 

|   |             |             |             |
|---|-------------|-------------|-------------|
| C | -1.45833336 | -0.03086156 | -0.00040400 |
| C | -1.77616636 | 1.15650344  | -0.11914800 |
| C | -0.47230436 | -1.11253856 | 0.17269800  |
| H | -0.77342836 | -2.01307256 | -0.37331100 |
| H | -0.43727636 | -1.39048256 | 1.23469000  |
| C | -1.49547236 | 2.59503244  | -0.25424500 |
| H | -2.19675336 | 3.19968944  | 0.33354100  |

|   |             |             |             |
|---|-------------|-------------|-------------|
| H | -1.63239536 | 2.88708444  | -1.30401800 |
| N | -4.03446636 | -0.16242356 | -0.21992000 |
| N | -3.39008536 | -1.10768956 | -0.07794400 |
| C | 1.38819164  | 0.68641544  | 0.32287200  |
| C | 0.91795164  | -0.64684956 | -0.28982400 |
| H | 1.63658864  | -1.43660956 | -0.03735300 |
| H | 0.91958264  | -0.56272856 | -1.38432400 |
| H | 1.02356164  | 0.75285244  | 1.35785000  |
| H | 2.48079264  | 0.64250444  | 0.39608000  |
| C | 1.02133764  | 1.98850444  | -0.44033200 |
| C | -0.05374536 | 2.89312544  | 0.19339400  |
| H | 0.00271964  | 2.80883044  | 1.28628000  |
| H | 0.16052564  | 3.94129644  | -0.04948300 |
| H | 1.93480264  | 2.58705944  | -0.53170600 |
| H | 0.72320564  | 1.74162144  | -1.46880800 |
| N | -3.97594736 | 1.06679044  | -0.45544800 |
| C | -4.90704036 | 1.92711944  | 0.27171600  |
| H | -4.81423836 | 1.80539144  | 1.35769200  |
| H | -4.65257036 | 2.95259244  | 0.00145600  |
| H | -5.94204136 | 1.73973144  | -0.03095200 |

**Az-9yne-TS** $E = -554.877499$  $H = -554.863134$  $G = -554.917466$  $N_{\text{imag}} = 0, \nu = -452.0438i \text{ cm}^{-1}$ 

|   |             |             |             |
|---|-------------|-------------|-------------|
| C | -1.30401237 | 1.31161596  | 0.01716999  |
| C | -1.03096337 | 0.10390796  | -0.01371101 |
| C | -2.18163037 | 2.50124196  | 0.08317299  |
| H | -1.82110237 | 3.26999296  | -0.60886301 |
| H | -2.10769537 | 2.93597396  | 1.08909899  |
| C | -1.27622237 | -1.35328904 | -0.03996201 |
| H | -0.62441637 | -1.86281304 | 0.68039299  |
| H | -1.00933037 | -1.74024904 | -1.03252801 |
| N | 1.26810063  | 1.34049296  | -0.16048801 |
| N | 0.62365763  | 2.29752596  | -0.08164701 |
| C | -4.24111337 | 1.09532596  | 0.72808399  |
| C | -3.64264637 | 2.14372196  | -0.23253101 |
| H | -4.23647837 | 3.06499496  | -0.20811001 |
| H | -3.68812037 | 1.77736596  | -1.26594201 |
| H | -3.47168537 | 0.78398596  | 1.44678599  |
| H | -5.04137537 | 1.55211996  | 1.32178299  |
| C | -2.74574937 | -1.67762404 | 0.27832199  |
| H | -2.94786737 | -1.36639004 | 1.31088199  |
| H | -2.86824837 | -2.76691804 | 0.25779899  |
| N | 1.15322363  | 0.10154996  | -0.32040001 |
| C | 2.10347063  | -0.76192104 | 0.37441299  |
| H | 3.11644163  | -0.63665904 | -0.02076301 |
| H | 2.10701263  | -0.58559704 | 1.45674999  |
| H | 1.78721563  | -1.78741204 | 0.17850299  |
| C | -4.80431537 | -0.14594904 | 0.02348599  |
| C | -3.74886837 | -1.00674004 | -0.68298401 |
| H | -4.26223637 | -1.77329904 | -1.27480601 |
| H | -3.19994037 | -0.38467204 | -1.40152601 |
| H | -5.33509937 | -0.76802504 | 0.75761699  |
| H | -5.55634337 | 0.17518296  | -0.71043001 |

**Az-2yne-adduct***E* = -359.883310*H* = -359.873784*G* = -359.916729*N*<sub>imag</sub> = 0

|   |             |             |             |
|---|-------------|-------------|-------------|
| C | -0.74969804 | 1.29801027  | 0.28339089  |
| C | -1.87494704 | 2.09730727  | 0.28477189  |
| C | 0.69709496  | 1.66982027  | 0.28597489  |
| H | 1.22150896  | 1.17175227  | -0.53430211 |
| H | 1.17734996  | 1.36694727  | 1.22151989  |
| C | -2.08533204 | 3.57395527  | 0.28549389  |
| H | -2.61614904 | 3.90506027  | 1.18525589  |
| H | -2.66476804 | 3.89862227  | -0.58603411 |
| N | -2.44868504 | -0.05140873 | 0.28647489  |
| N | -1.15527204 | -0.00307073 | 0.28442889  |
| N | -2.90062604 | 1.20723927  | 0.28710889  |
| C | -4.32283104 | 1.47395227  | 0.28471389  |
| H | -4.60496404 | 2.04719527  | 1.17190089  |
| H | -4.60609104 | 2.02884227  | -0.61382911 |
| H | -4.82882204 | 0.50852227  | 0.29480489  |
| H | -1.12236104 | 4.08832527  | 0.25761189  |
| H | 0.82779696  | 2.74937527  | 0.17022589  |

**Az-7yne-adduct***E* = -476.501826*H* = -476.491257*G* = -476.536674*N*<sub>imag</sub> = 0

|   |             |             |             |
|---|-------------|-------------|-------------|
| C | -1.11067038 | 0.64390690  | 0.27497070  |
| C | -0.66455438 | 1.94987090  | 0.31430670  |
| C | -2.49326538 | 0.10840190  | 0.46815170  |
| H | -2.74266038 | 0.09753090  | 1.53931270  |
| H | -2.48714138 | -0.93578810 | 0.13912870  |
| C | -1.38166338 | 3.24077490  | 0.54636370  |
| H | -0.73398138 | 4.07684690  | 0.25734270  |
| H | -1.58021338 | 3.36156090  | 1.62123770  |
| N | 1.02796562  | 0.55990390  | -0.07267730 |
| N | -0.04171738 | -0.16316210 | 0.03426770  |
| C | -3.78538938 | 2.33479890  | 0.18847770  |
| C | -3.57499138 | 0.88972990  | -0.28417730 |
| H | -3.34170138 | 0.88940190  | -1.35751930 |
| H | -4.52332738 | 0.35134290  | -0.16853930 |
| H | -4.74018838 | 2.68866390  | -0.21890930 |
| H | -3.89862738 | 2.34785190  | 1.28327070  |
| C | -2.70582838 | 3.34502590  | -0.22142830 |
| H | -2.50588638 | 3.24619790  | -1.29669730 |
| H | -3.09980038 | 4.35638990  | -0.06480630 |
| N | 0.67024762  | 1.83906290  | 0.09479470  |
| C | 1.67137462  | 2.88285490  | 0.01440770  |
| H | 2.63059162  | 2.38951290  | -0.14103730 |
| H | 1.46250362  | 3.55094390  | -0.82542430 |
| H | 1.69929562  | 3.45774690  | 0.94338570  |

**Az-8yne-adduct***E* = -515.760495*H* = -515.748803*G* = -515.796662*N*<sub>imag</sub> = 0

|   |             |            |            |
|---|-------------|------------|------------|
| C | -1.26930129 | 2.26079383 | 0.48695731 |
| C | -1.80848029 | 3.53127783 | 0.38337831 |
| C | 0.09675571  | 1.74926283 | 0.84212331 |
| H | -0.04024729 | 0.68092383 | 1.03771031 |
| H | 0.45900371  | 2.19162483 | 1.77784831 |
| C | -1.28924129 | 4.91621483 | 0.61151731 |
| H | -1.74350229 | 5.33476183 | 1.52048331 |

|   |             |            |             |
|---|-------------|------------|-------------|
| H | -1.61245629 | 5.56061483 | -0.21890069 |
| N | -3.33192429 | 1.99858883 | -0.15402069 |
| N | -2.24366929 | 1.36734883 | 0.14546731  |
| C | 1.86875071  | 3.26504383 | -0.33108869 |
| C | 1.15415471  | 1.91263983 | -0.26601369 |
| H | 1.91916171  | 1.13955883 | -0.12441069 |
| H | 0.67701571  | 1.70303183 | -1.23250069 |
| H | 2.45461971  | 3.41167583 | 0.58829431  |
| H | 2.59710271  | 3.21521783 | -1.14999669 |
| C | 0.97222571  | 4.49146583 | -0.54462769 |
| C | 0.23492471  | 4.97947583 | 0.72217031  |
| H | 0.55694071  | 4.40271583 | 1.59639031  |
| H | 0.50805171  | 6.01837983 | 0.93614331  |
| H | 1.59331271  | 5.30824683 | -0.92879569 |
| H | 0.24273371  | 4.26736483 | -1.33595469 |
| N | -3.08692729 | 3.30513983 | -0.01652869 |
| C | -4.12850329 | 4.27267183 | -0.28946169 |
| H | -4.31412529 | 4.89222383 | 0.59196931  |
| H | -3.84749829 | 4.91098983 | -1.13171169 |
| H | -5.02744229 | 3.71002283 | -0.54062069 |

**Az-9yne-adduct***E* = -555.020596*H* = -555.007734*G* = -555.058035*N*<sub>imag</sub> = 0

|   |             |             |             |
|---|-------------|-------------|-------------|
| C | -1.22233910 | 1.46210493  | 0.38795417  |
| C | -0.66905010 | 0.19155293  | 0.41289117  |
| C | -2.54299410 | 2.02500993  | 0.83322117  |
| H | -2.32904210 | 3.07333393  | 1.06417917  |
| H | -2.85666510 | 1.56734493  | 1.77862717  |
| C | -1.16636510 | -1.15893507 | 0.83776117  |
| H | -0.82854210 | -1.38083307 | 1.85893617  |
| H | -0.71677210 | -1.92327907 | 0.18877817  |
| N | 0.77676490  | 1.64952193  | -0.45048383 |
| N | -0.29418310 | 2.30786993  | -0.14686483 |
| C | -4.79671310 | 0.90714393  | 0.05776117  |
| C | -3.72186010 | 1.98798393  | -0.17994183 |
| H | -4.21797610 | 2.96234393  | -0.12054183 |
| H | -3.32621310 | 1.91863293  | -1.20178483 |
| H | -4.86273910 | 0.70602293  | 1.13549017  |
| H | -5.77565110 | 1.31704993  | -0.21839483 |
| C | -2.69272510 | -1.26032807 | 0.75352817  |
| H | -3.12752310 | -0.54662107 | 1.45935317  |
| H | -3.00756210 | -2.25316707 | 1.09518117  |
| N | 0.56695290  | 0.37095493  | -0.12038583 |
| C | 1.60339290  | -0.61346307 | -0.35349783 |
| H | 2.47947290  | -0.07240607 | -0.71081383 |
| H | 1.84555990  | -1.13785307 | 0.57427917  |
| H | 1.28500890  | -1.33595407 | -1.11023783 |
| C | -4.62155310 | -0.40839307 | -0.71733983 |
| C | -3.21134810 | -0.99458507 | -0.66471683 |
| H | -3.17666210 | -1.92425107 | -1.24694083 |
| H | -2.53424010 | -0.29596507 | -1.17113883 |
| H | -5.34912810 | -1.13959307 | -0.33944883 |
| H | -4.87912310 | -0.23287107 | -1.77003783 |
